# Supplementary material
Source: PubMed Central journal article supplement (PMC1618110)
Supplement: 7601356s2.pdf [file 7601356s2.pdf]

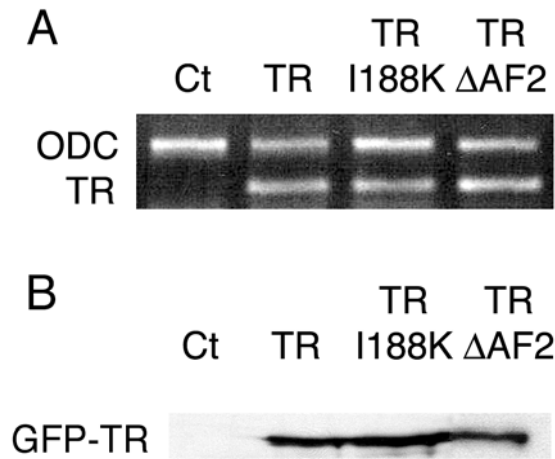

**Supplementary Figure S2: The level of expression of the different transgenes was similar within the different batches of embryos.** A) The level of TR, TRI188K and TR $\Delta$ AF2 mRNA over-expressed in transgenic embryos are similar. Total RNAs were isolated from 50 embryos, 48h post-transgenesis (stage NF28). RT-PCR analysis was carried out (30 PCR cycles) to determine the mRNA levels of exogenous *TR* variant and the internal control gene *ODC*. After electrophoresis on 2% agarose gel, the gel was stained with ethidium bromide. B) The level of TR, TRI188K and TR $\Delta$ AF2 proteins over-expressed in transgenic embryos are similar. Total protein extracts were isolated from 20 embryos at stage NF28. Western blot analysis was carried out to determine the protein levels of the different TR fusion protein with GFP. Protein extracts (20  $\mu$ g) were loaded on a Tris-glycine 12% gel. Proteins were transferred to a nitrocellulose membrane and rabbit anti-TR antibody used to reveal TR presence by chemiluminescence. The results represent one of at least two independent experiments, providing similar results.
