# Supplementary material
Source: PubMed Central journal article supplement (PMC1618110)
Supplement: 7601356s3.pdf [file 7601356s3.pdf]

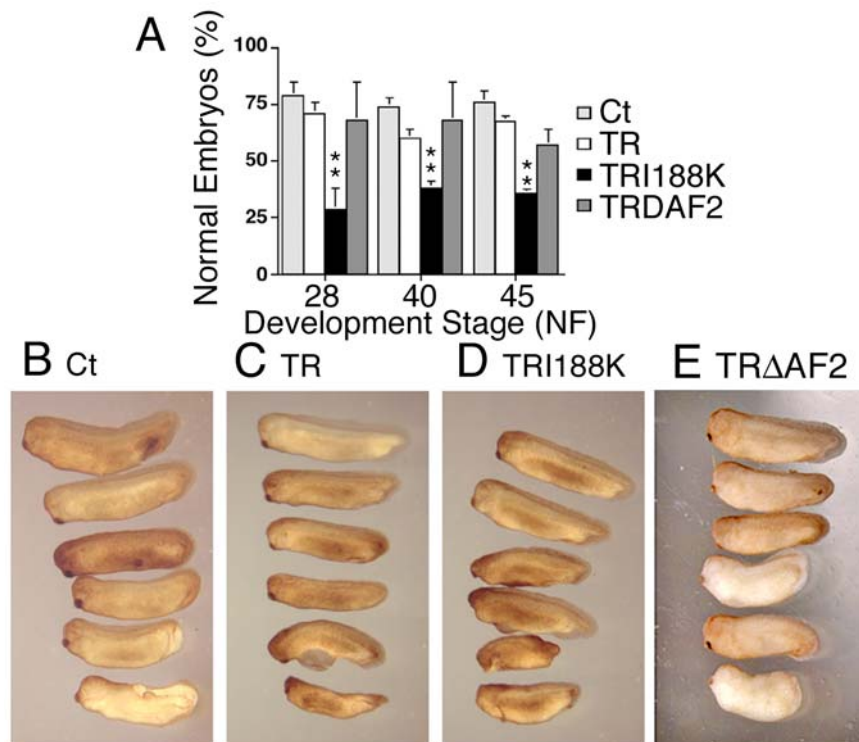

**Supplementary Figure S3: TRI188K transgenic embryos display various phenotypes during early development.** A) The percentages of embryos with normal morphological development in transgenic embryos expressing either GFP or GFP fused to TR, TRI188K or TR $\Delta$ AF2 were analysed up to stage NF45. The number of normal embryos were measured and transformed as % of total number of embryos in each group. Means +/- S.E.M. are given. Each point represents results from three independent experiments with at least 300 animals per group. \*\* Indicates significant changes ( $p < 0.01$ ) compared to Ct values. Panels B to E) A sample of each group of transgenic embryos was photographed 48h post transgenesis (stage NF28).
