# Supplementary material
Source: PubMed Central journal article supplement (PMC1618110)
Supplement: 7601356s4.pdf [file 7601356s4.pdf]

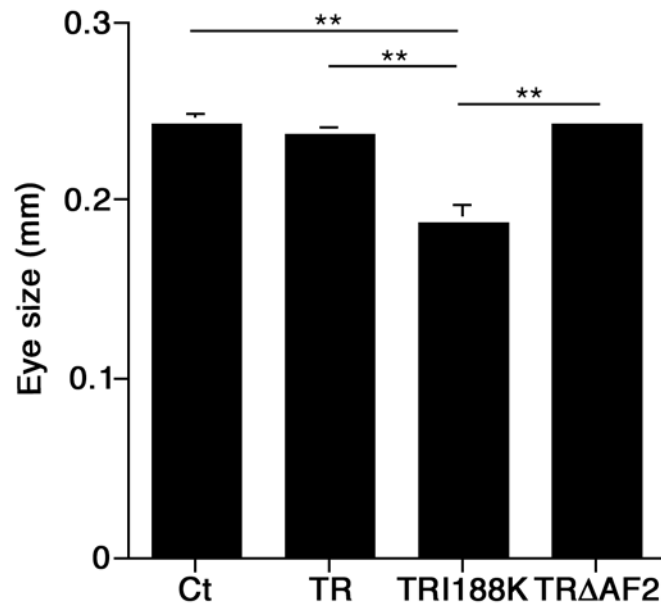

**Supplementary Figure S4: TRI188K expression decreases the height of the developing eye.** *Pax-6* expression localised at stage NF28 by whole mount ISH was used a molecular marker for eye development. Eye diameter of the different transgenic embryos presented in Figure 5 was measured. Means +/- S.E.M. are given. Each point represents five to ten animals. Significant changes (\*\*:  $p < 0.01$ ) are indicated.
