# Supplementary material
Source: PubMed Central journal article supplement (PMC1618110)
Supplement: 7601356s5.pdf [file 7601356s5.pdf]

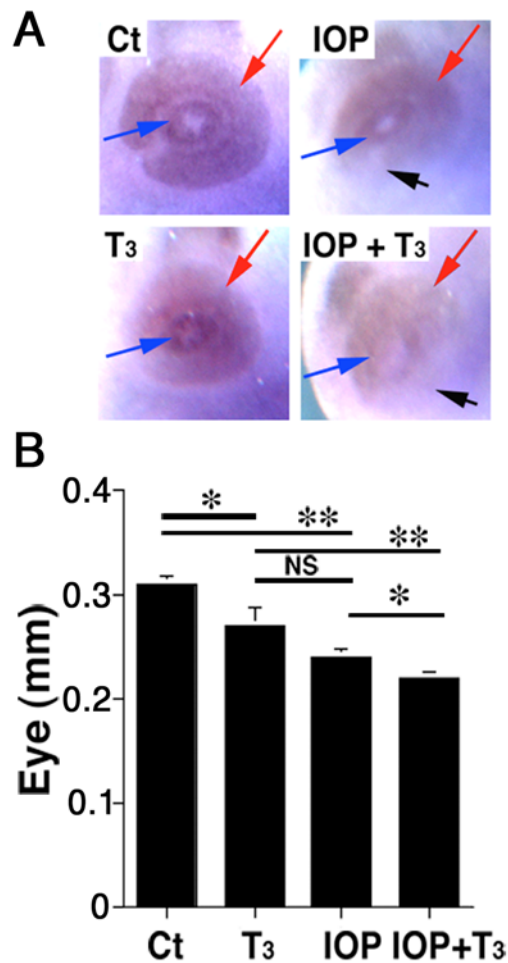

**Supplementary Figure S5: IOP treatment affects *Pax-6* expression, a molecular marker for eye development.** Embryos at stage NF11-12 were treated for 24h with either 5  $\mu$ M IOP, 10 nM T<sub>3</sub>, or 5  $\mu$ M IOP with 10 nM T<sub>3</sub>. Controls received 0.1% ethanol (Ct). *Pax6* expression was localised by whole mount ISH at stage NF28. Panels A show a high magnification of the eye area for one representative embryo (from a total of 5 to 10 embryos) of the major phenotype observed. Blue arrows indicate the lens and red arrows indicate the retina. The black arrows indicate the area where the retina has failed to develop. B) IOP and T<sub>3</sub> treatment decrease the height of the developing eye. Eye diameter of the different embryos presented in panel A was measured. Means +/- S.E.M. are given. Each point represents five to ten animals. Significant changes (\*: p<0.05) and (\*\*: p<0.01) are indicated. NS: not significant.
