# Supplementary material
Source: PubMed Central journal article supplement (PMC1618110)
Supplement: 7601356s6.pdf [file 7601356s6.pdf]

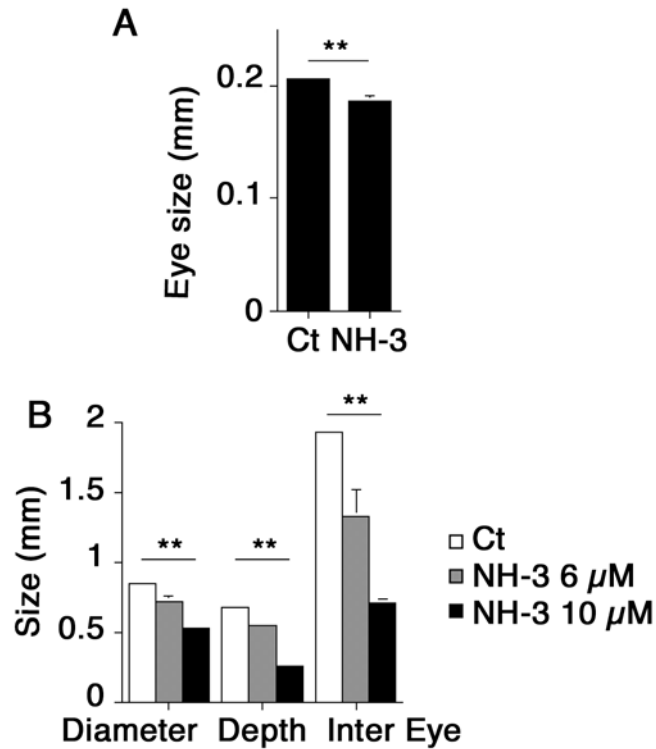

**Supplementary Figure S6: Effect of NH-3 treatment on the eye.** Embryos at morula stage were treated (48h) with either 0.1% ethanol, NH-3 (6 or 10  $\mu$ M), or were treated with 0.1% ethanol (Ct). A) *Pax-6* expression localised by whole mount ISH at stage NF28 was used as a molecular marker for eye development. Eye diameter of the Ct and NH-3 treated embryos presented in Figure 7B (*Pax6* ISH) was measured. Means  $\pm$  S.E.M. are given. Each point represents five to ten animals. Significant changes (\*\*:  $p < 0.01$ ) are indicated. B) 6 or 10  $\mu$ M NH-3 treatment decreases the height, the width and the inter-eye distance of the eye at stage NF45. Means  $\pm$  S.E.M. are given,  $n=5$ . Significant changes (\*\*:  $p < 0.01$ ) are indicated.
